# Supplementary material
Source: PubMed Central journal article supplement (PMC6726582)

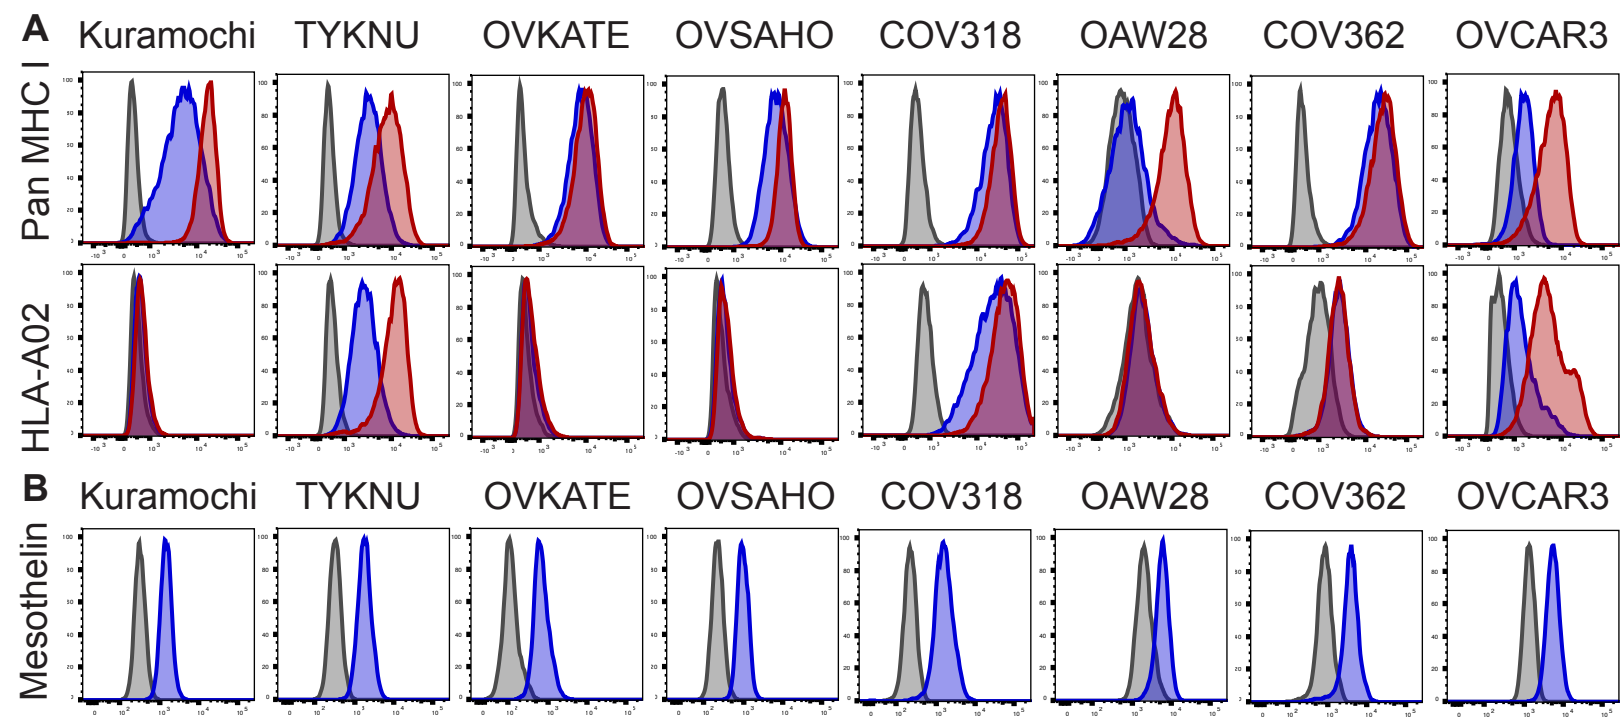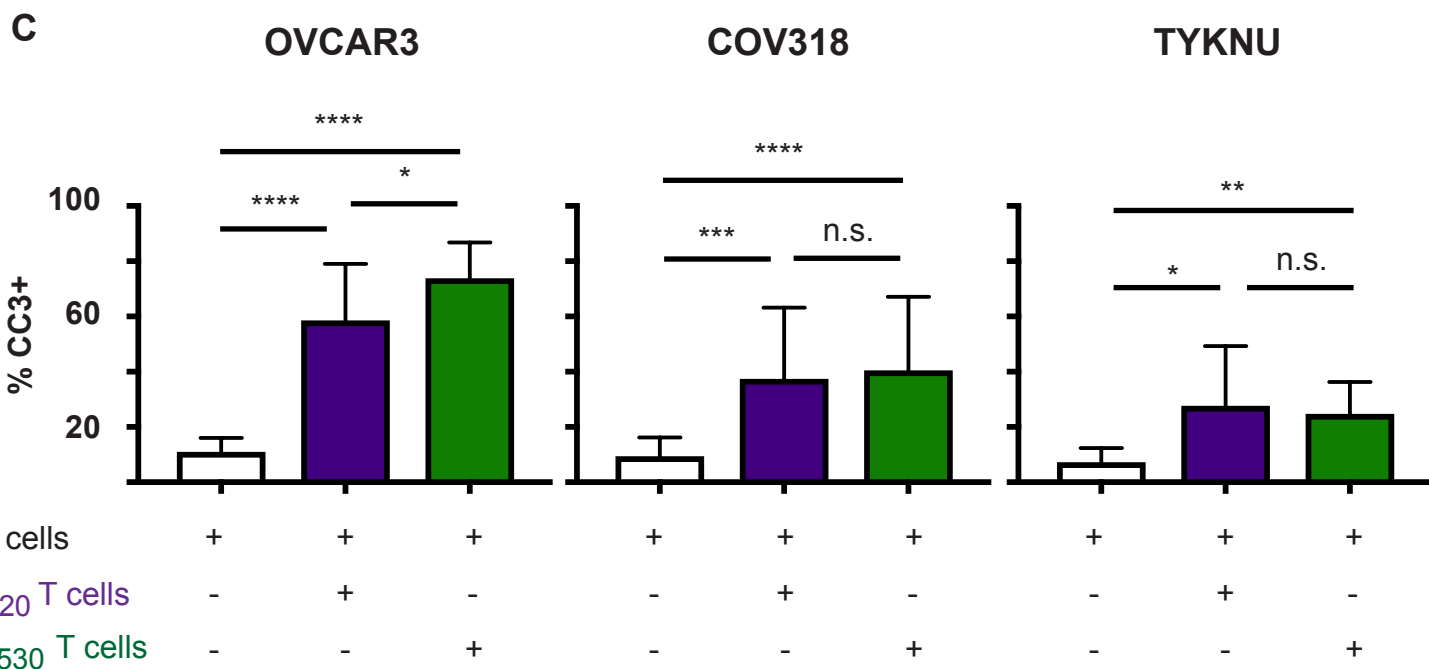

Supplement: NIHMS1535763-supplement-2.pdf [file NIHMS1535763-supplement-2.pdf]

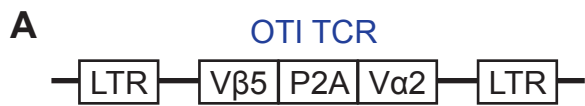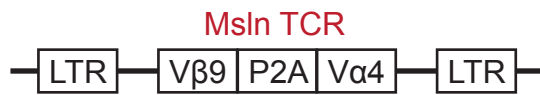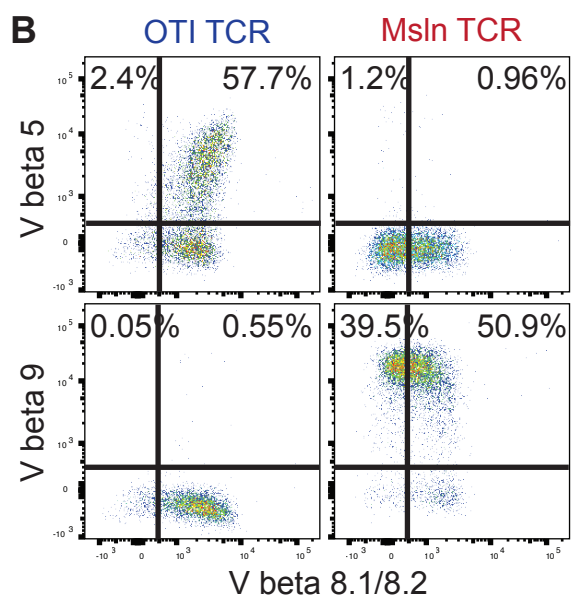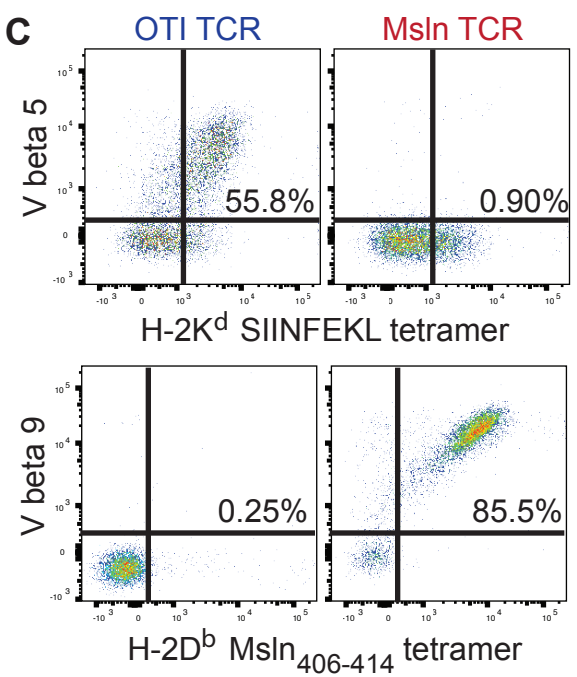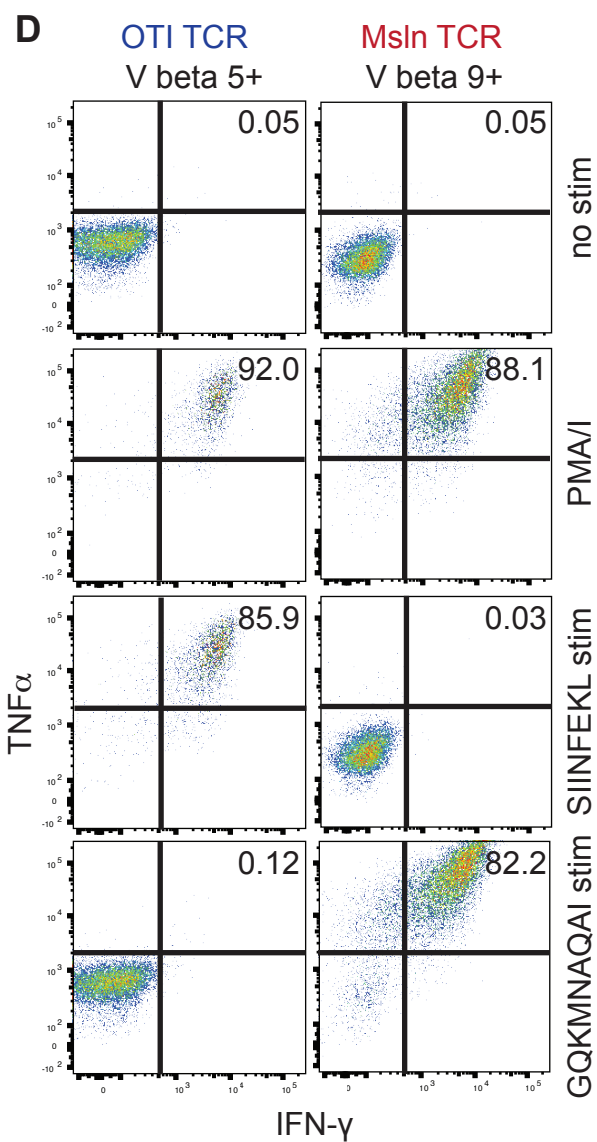

Supplement: NIHMS1535763-supplement-3.pdf [file NIHMS1535763-supplement-3.pdf]

**A**

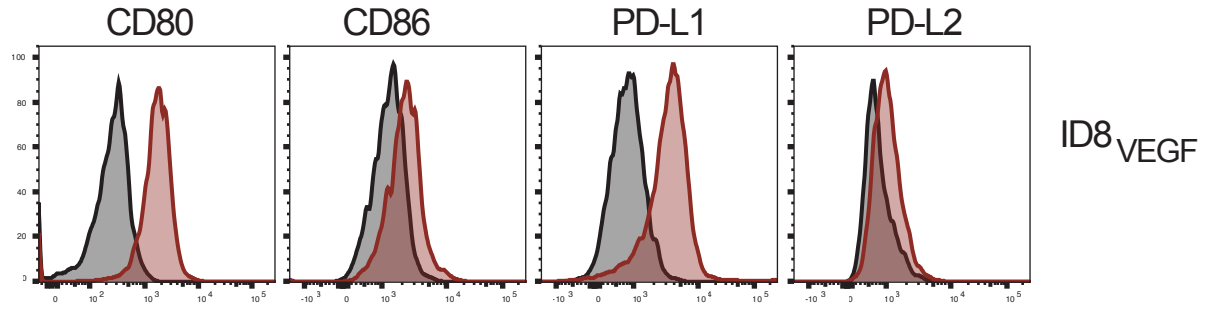

**B**

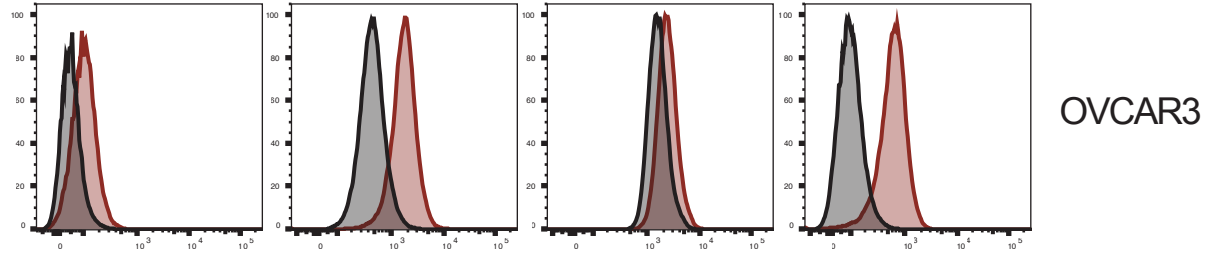

Supplement: NIHMS1535763-supplement-4.pdf [file NIHMS1535763-supplement-4.pdf]

A

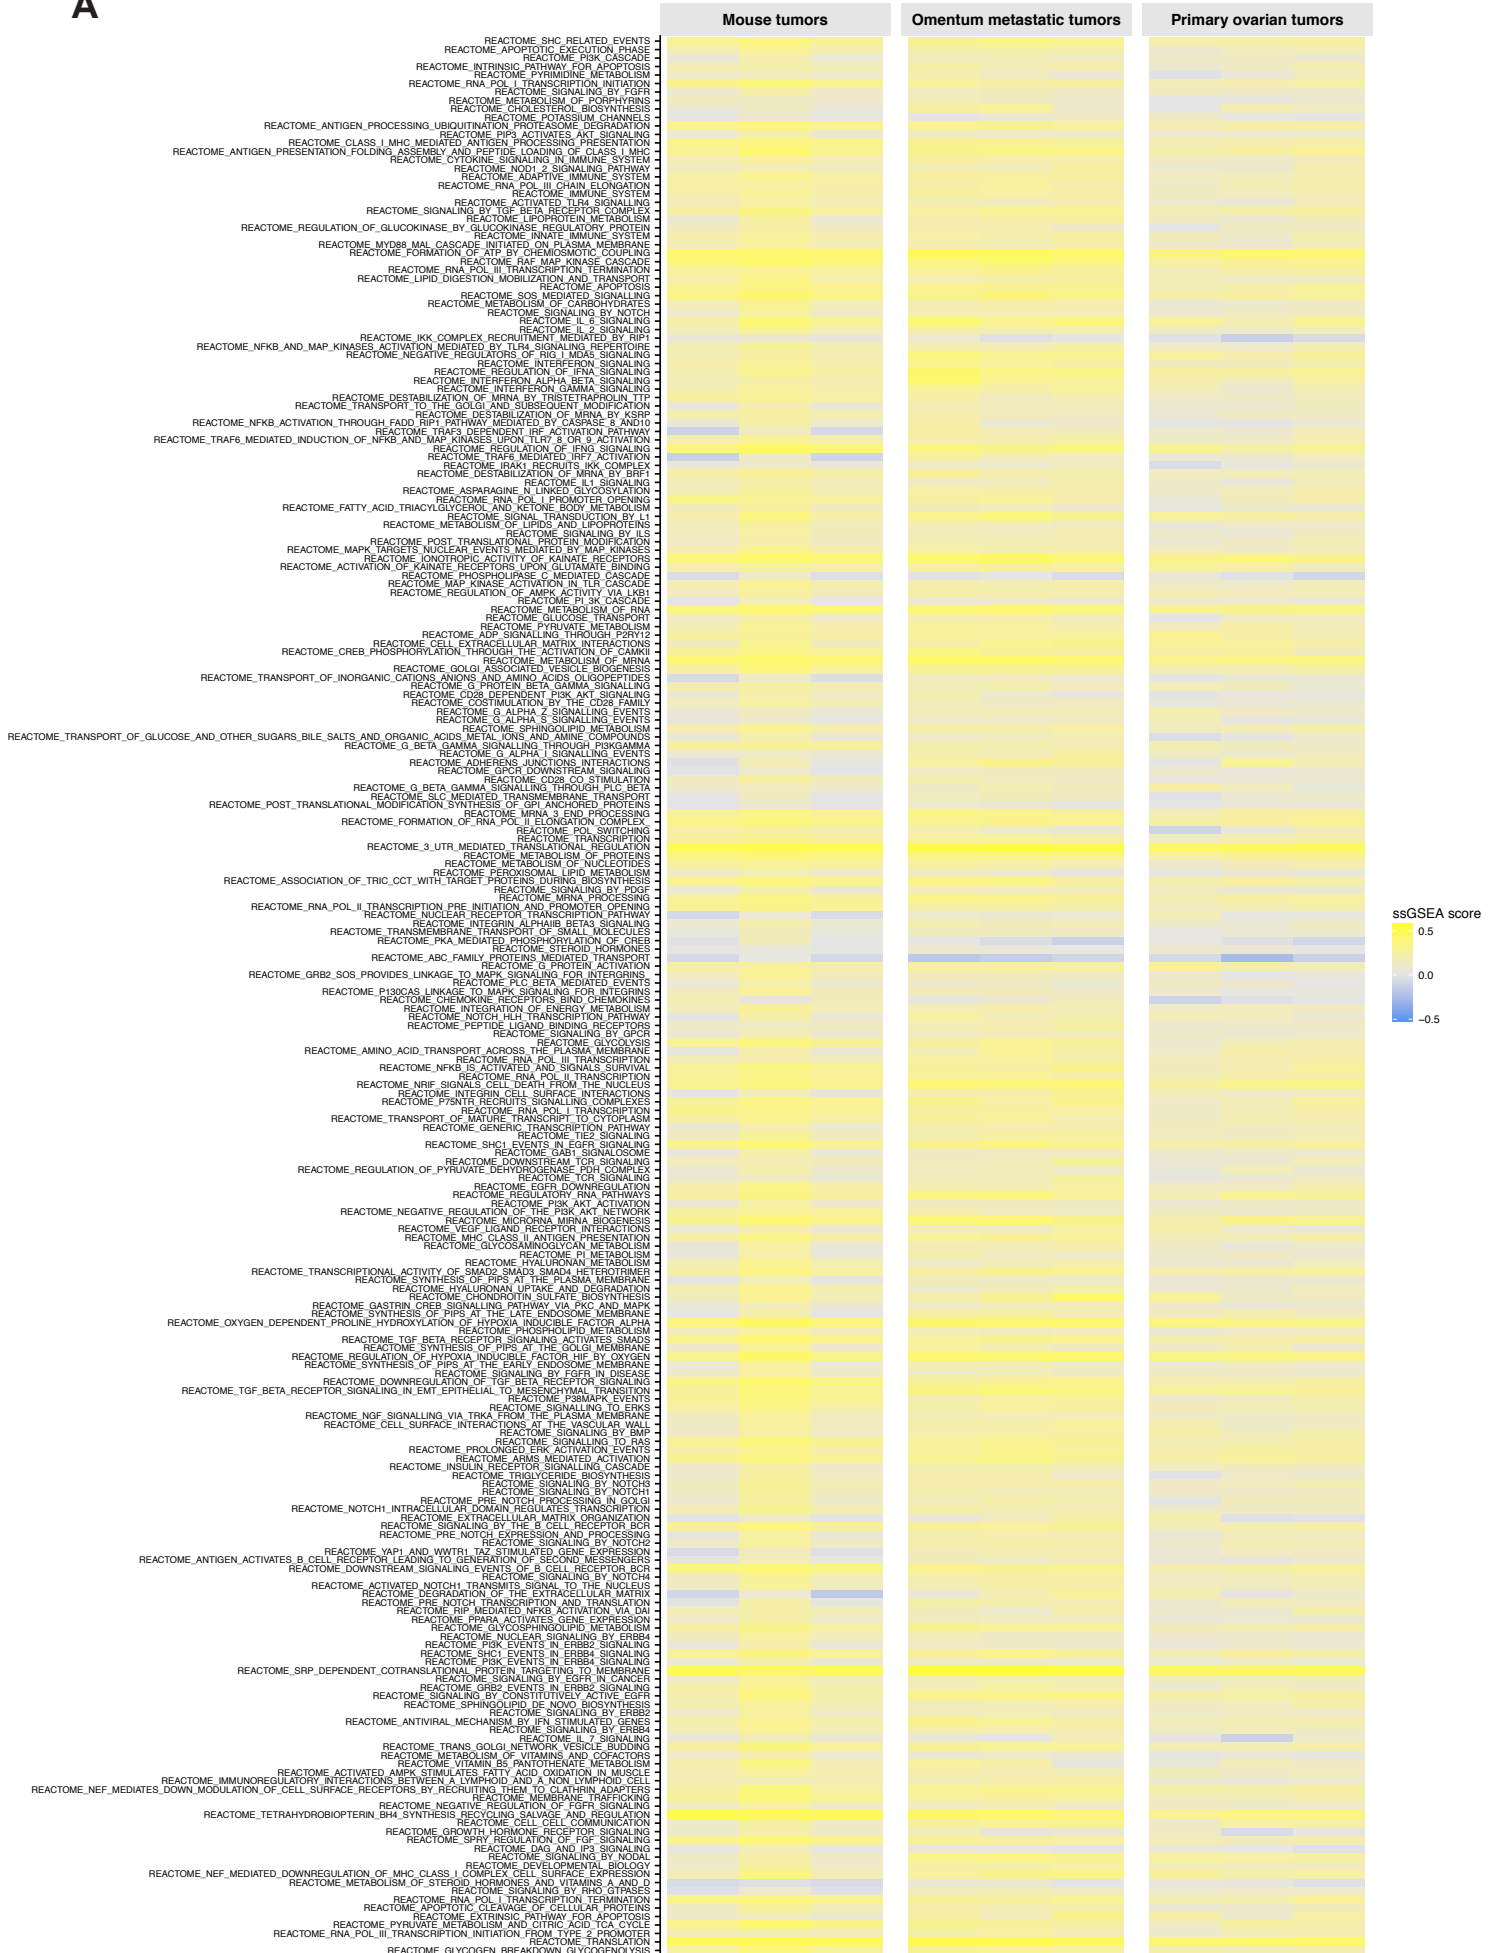

Supplement: NIHMS1535763-supplement-5.pdf [file NIHMS1535763-supplement-5.pdf]

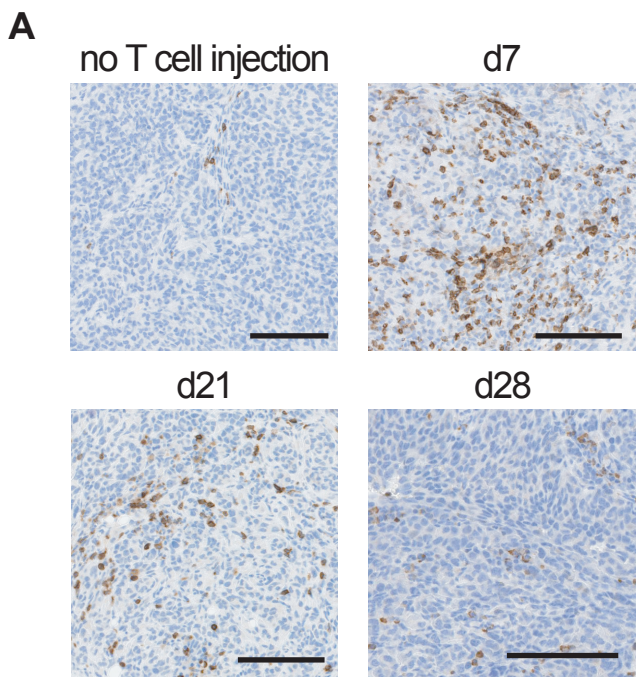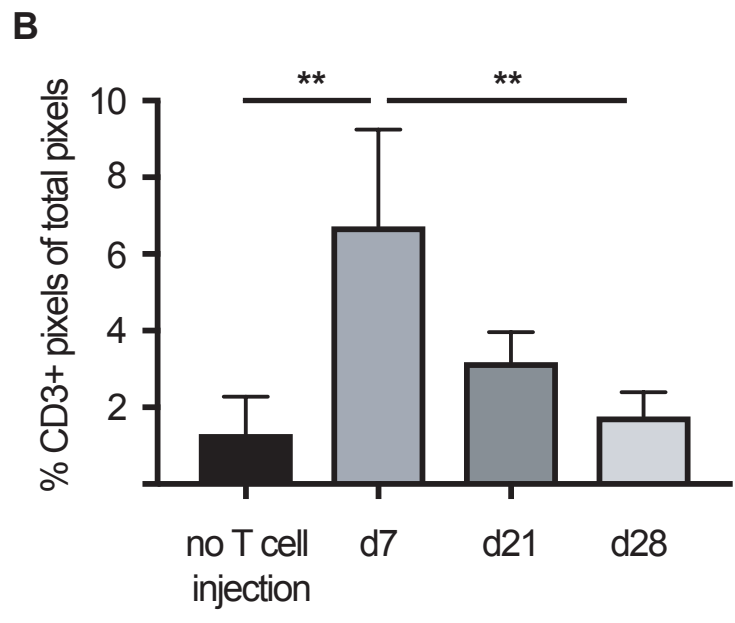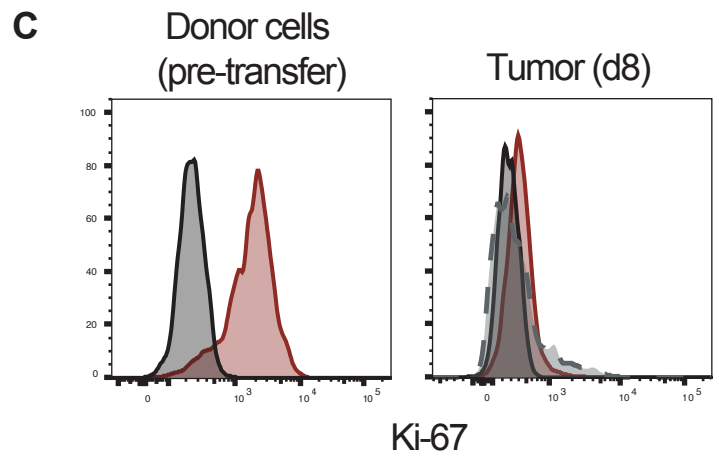

Supplement: NIHMS1535763-supplement-6.pdf [file NIHMS1535763-supplement-6.pdf]

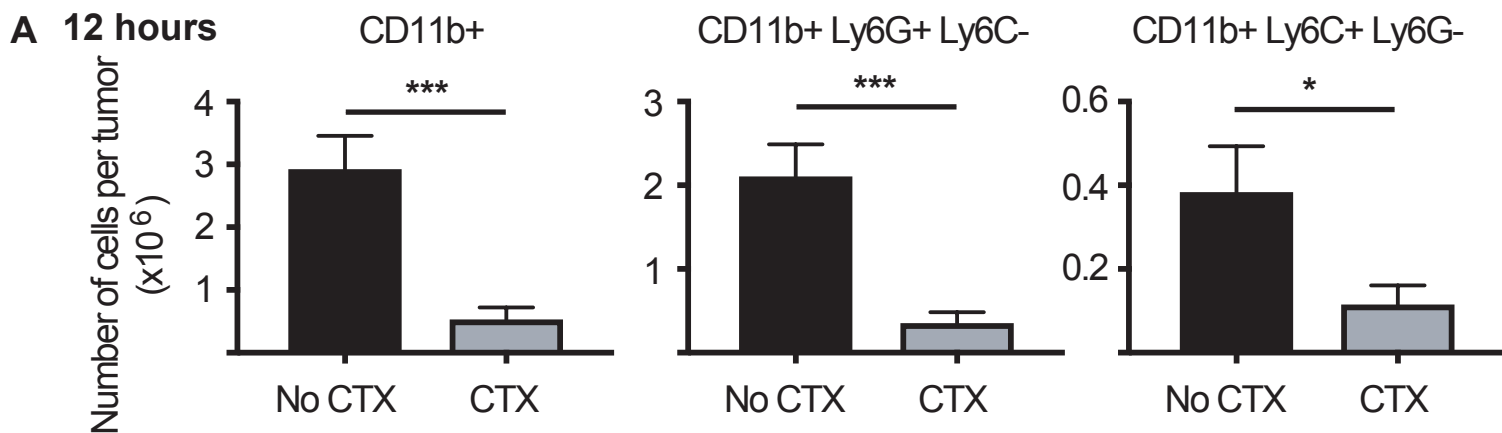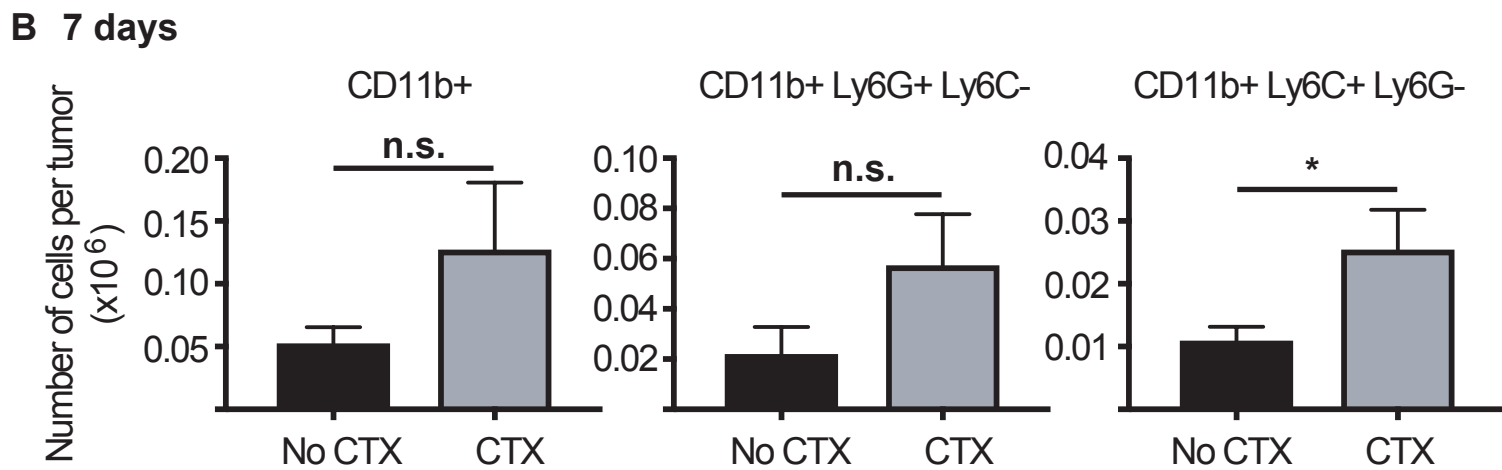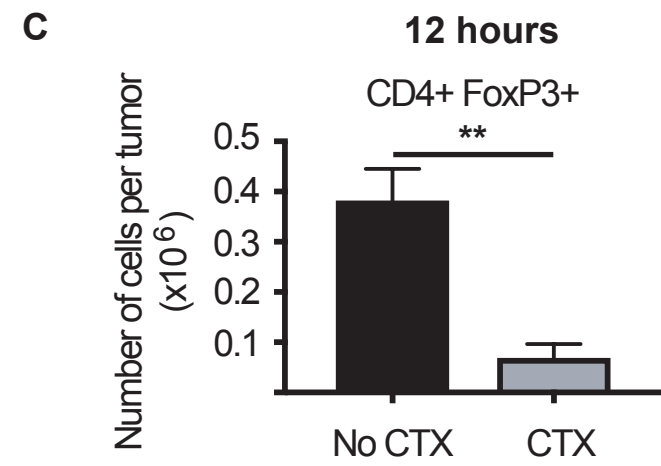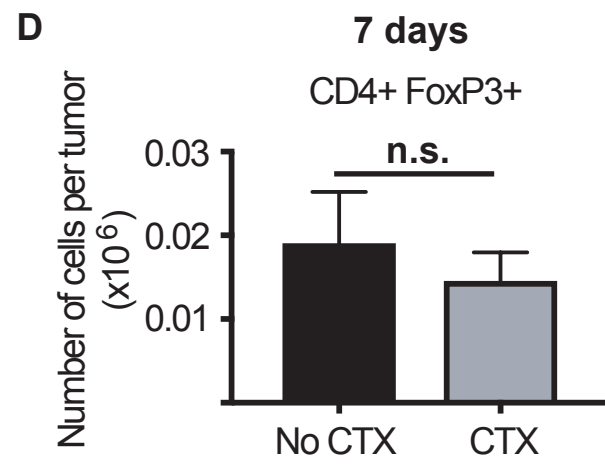

Supplement: NIHMS1535763-supplement-7.pdf [file NIHMS1535763-supplement-7.pdf]

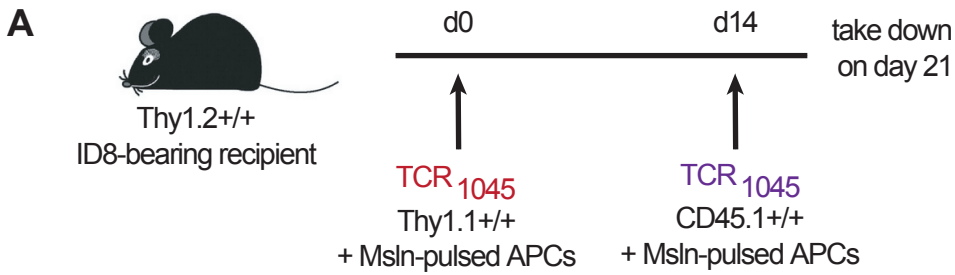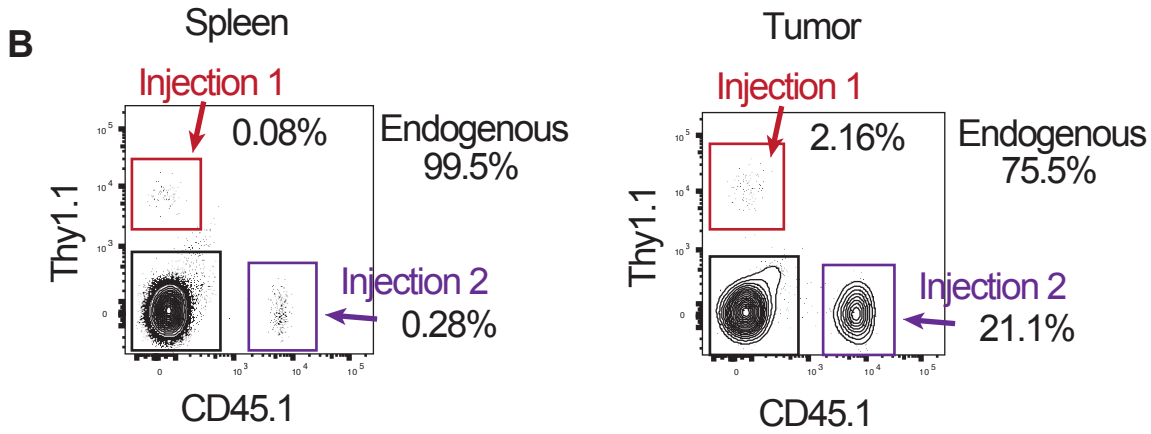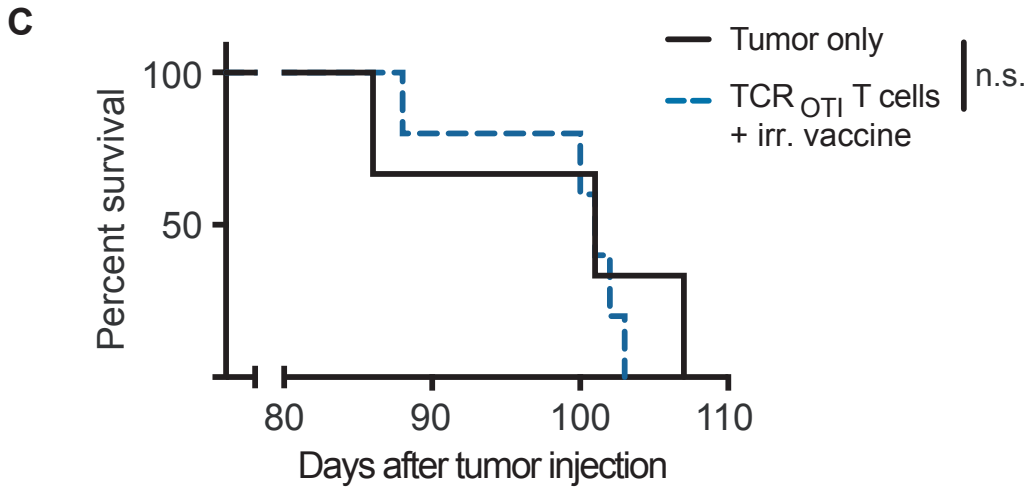

**D** TCR<sub>OTI</sub>-treated mouse after 4 injections

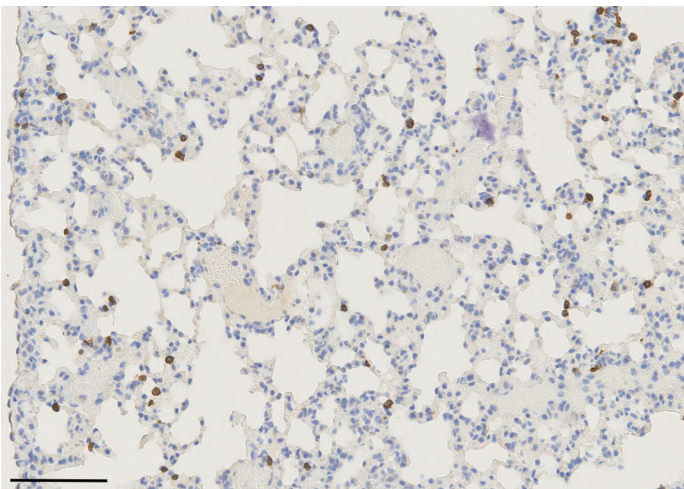

**E** TCR<sub>1045</sub>-treated mouse after 8 injections

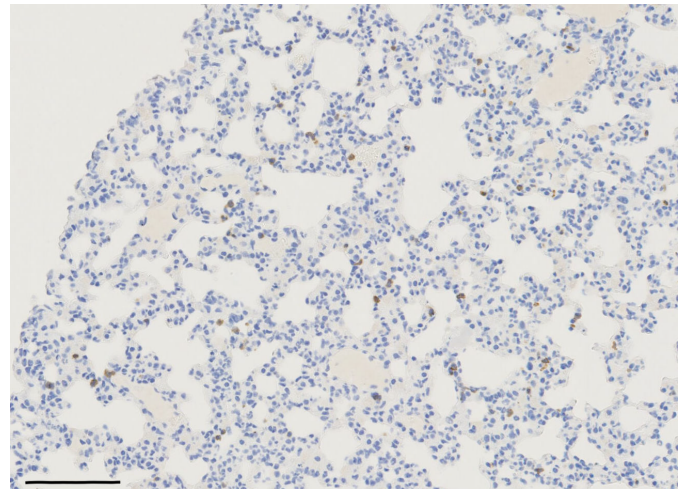

Supplement: NIHMS1535763-supplement-8.pdf [file NIHMS1535763-supplement-8.pdf]
